# Supplementary material for: European follow-up of incorrect biomarker results for colorectal cancer demonstrates the importance of quality improvement projects
Source: Springer Nature journal article supplement (doi:10.1007/s00428-019-02525-9), 2019-02-04
Supplement: MOESM1 [file 16444038]

Title European follow-up of incorrect biomarker results for colorectal cancer demonstrates the importance of quality improvement projects.

Journal Virchows Archiv

Authors Keppens Cleo, Dufraing Kelly, van Krieken J Han, Siebers G Albert, Kafatos George, Lowe Kimberly, Demonty Gaston, Dequeker MC Elisabeth

Correspondence Prof. Dr. Elisabeth Dequeker, Department of Public Health and Primary Care, Biomedical Quality Assurance Research Unit, University of Leuven, Kapucijnenvoer 35d, Box 7001, Leuven 3000, Belgium.  
Tel: +3216 345881, Fax: +3216 347949. E-mail: [els.dequeker@kuleuven.be](mailto:els.dequeker@kuleuven.be)

File **Supplemental Table 1: Overview of the samples provided during the 2016 and 2017 ESP colon EQA schemes.**  
Participating laboratories received three slides of ten formalin-fixed paraffin embedded cases for analysis by their routine procedures. In 2016, the preparation and validation of the samples was done by 8 scheme organizers (Each organizer prepared, validated, and sent samples for approximately 16 participants). In 2017, this was performed by one central reference laboratory, and confirmed by a second independent laboratory.  
Reference sequences used at the time of analysis: *KRAS*: NM\_033360.3; NM\_004985.4. *NRAS*: LRG\_92 (NM\_002524.3), *BRAF*: LRG\_299 (NM\_004333.4).  
Abbreviations: *BRAF*: B-Raf proto-oncogene, *KRAS*: Kirsten rat sarcoma viral oncogene homolog, *NRAS*: neuroblastoma rat sarcoma, WT: Wild-type.

| Scheme year   | 2016          |                                                          |                                    |                                    | 2017                               |                                    |                                    |
|---------------|---------------|----------------------------------------------------------|------------------------------------|------------------------------------|------------------------------------|------------------------------------|------------------------------------|
| Sample number | Subscheme     | KRAS                                                     | NRAS                               | BRAF                               | KRAS                               | NRAS                               | BRAF                               |
| 1             | A, B, D, E, F | WT                                                       | c.181C>A<br>p.(Gln61Lys)           | WT                                 | Sample without<br>neoplastic cells | Sample without<br>neoplastic cells | Sample without<br>neoplastic cells |
|               | G, H          |                                                          | c.182A>T<br>p.(Gln61Leu)           |                                    |                                    |                                    |                                    |
|               | C             |                                                          | c.182A>G<br>p.(Gln61Arg)           |                                    |                                    |                                    |                                    |
| 2             | All           | WT                                                       | WT                                 | WT                                 | c.176C>A<br>p.(Ala59Glu)           | WT                                 | WT                                 |
| 3             | All           | Sample without<br>neoplastic cells                       | Sample without<br>neoplastic cells | Sample without<br>neoplastic cells | WT                                 | WT                                 | WT                                 |
|               | D             | WT                                                       | WT                                 | WT                                 |                                    |                                    |                                    |
| 4             | All           | c.35G>T<br>p.(Gly12Val)                                  | WT                                 | WT                                 | WT                                 | WT                                 | c.1799T>A<br>p.(Val600Glu)         |
| 5             | All           | c.38G>A<br>p.(Gly13Asp)                                  | WT                                 | WT                                 | WT                                 | c.182A>T<br>p.(Gln61Leu)           | WT                                 |
| 6             | All           | c.436G>A<br>p.(Ala146Thr)                                | WT                                 | WT                                 | WT                                 | WT                                 | WT                                 |
| 7             | All           | WT                                                       | WT                                 | WT                                 | c.35G>A<br>p.(Gly12Asp)            | WT                                 | WT                                 |
| 8             | All           | c.35G>A<br>p.(Gly12Asp)                                  | WT                                 | WT                                 | WT                                 | WT                                 | WT                                 |
|               | C             | c.35G>A<br>p.(Gly12Asp) and<br>c.351A>T<br>p.(Lys117Asn) |                                    |                                    |                                    |                                    |                                    |
| 9             | All           | WT                                                       | WT                                 | c.1799T>A<br>p.(Val600Glu)         | c.35G>C<br>p.(Gly12Ala)            | WT                                 | WT                                 |
| 10            | All           | WT                                                       | WT                                 | WT                                 | c.38G>A<br>p.(Gly13Asp)            | WT                                 | WT                                 |
